# Supplementary material for: Identification of Intron Retention in the Slc16a3 Gene Transcript Encoding the Transporter MCT4 in the Brain of Aged and Alzheimer-Disease Model (APPswePS1dE9) Mice
Source: MDPI journal article supplement (doi:10.3390/genes14101949), 2023-10-17
Supplement: s1 [file s1]

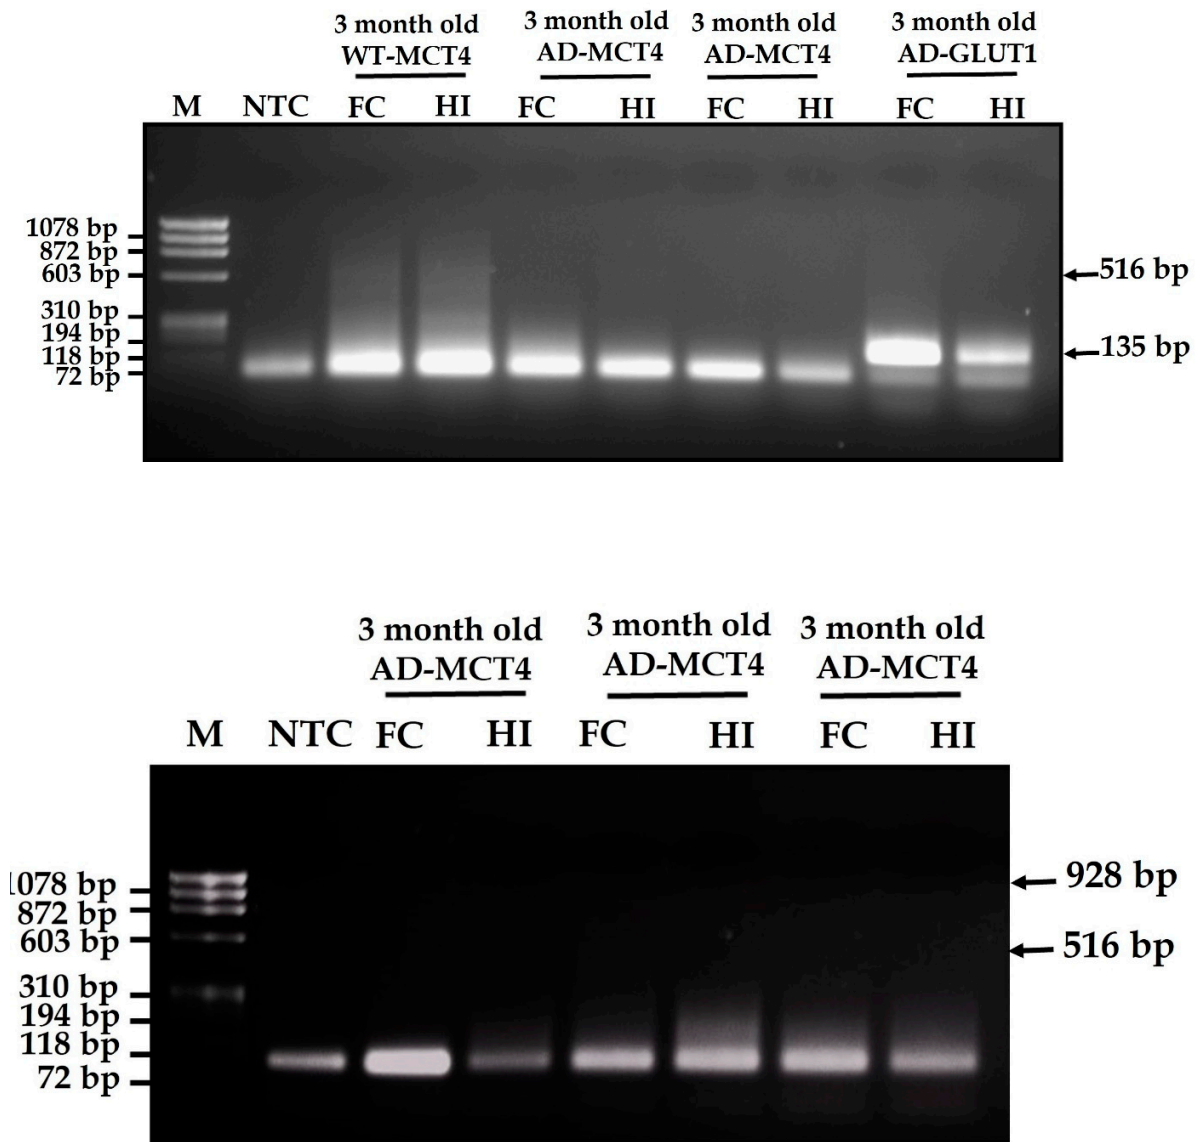

**Figure S1.** RT-PCR for the *Slc16a3* gene in the frontal cortex (FC) and hippocampus (HI) of 3month-old Alzheimer (AD) mice. As control, RT-sqPCR for the *Slc2a1* gene (coding for GLUT1) was performed and exhibited the expected 135 bp fragment.
